# Supplementary material
Source: MDPI journal article supplement (https://www.mdpi.com/2072-4292/15/16/4104)
Supplement: s1 [file s1]

## Supplementary Material

### *Spatiotemporal Weighted for Improving the Satellite-Based High-Resolution Ground PM<sub>2.5</sub> Estimation Using the Light Gradient Boosting Machine*

Xinyu Yu <sup>123,†</sup>, Mengzhu Xi <sup>123,†</sup>, Liyang Wu <sup>123,\*</sup> and Hui Zheng <sup>123</sup>

<sup>1</sup> College of Geography and Environmental Science, Henan University, Kaifeng 475004, China

<sup>2</sup> Key Laboratory of Geospatial Technology for Middle and Lower Yellow River Regions, Ministry of Education, College of Environment and Planning, Henan University, Kaifeng 475004, China

<sup>3</sup> Henan Key Laboratory of Integrated Air Pollution Control and Ecological Security, Kaifeng 475004, China

\* Correspondence: [wuly@henu.edu.cn](mailto:wuly@henu.edu.cn)

† These authors contributed equally to this work.

**Table S1.** Summary of the data sources used in this study.

| Variable | Description                       | Spatial<br>Resolution | Temporal<br>Resolution | Data Source                                                                                                     |
|----------|-----------------------------------|-----------------------|------------------------|-----------------------------------------------------------------------------------------------------------------|
| PM2.5    | PM2.5                             | -                     | hourly                 | CNEMC ( <a href="http://www.cnemc.cn">http://www.cnemc.cn</a> )                                                 |
| AOD      | Aerosol optical depth<br>(550 nm) | 1 km × 1 km           | Daily                  | MODIS products (MCD19A2)<br>( <a href="https://ladsweb.nascom.nasa.gov/">https://ladsweb.nascom.nasa.gov/</a> ) |
| BLH      | Boundary layer<br>height          |                       |                        |                                                                                                                 |
| RH       | Relative humidity                 | 0.25°×0.25°           | Hourly                 | ERA5 reanalysis products                                                                                        |
| TEM      | 2-m air temperature               |                       |                        | ( <a href="https://cds.climate.copernicus.eu/">https://cds.climate.copernicus.eu/</a> )                         |
| SP       | Surface pressure                  |                       |                        |                                                                                                                 |
| WS       | 10-m wind speed                   |                       |                        |                                                                                                                 |
|          | Normalized                        |                       |                        |                                                                                                                 |
| NDVI     | difference<br>vegetation index    | 1 km × 1 km           | Monthly                | MODIS products<br>( <a href="https://ladsweb.nascom.nasa.gov/">https://ladsweb.nascom.nasa.gov/</a> )           |
| LUCC     | Land-use cover                    | 500 m × 500 m         | Annual                 |                                                                                                                 |
| DEM      | Elevation                         | 30 m × 30 m           | -                      | SRTM<br>( <a href="http://gdex.cr.usgs.gov/gdex/">http://gdex.cr.usgs.gov/gdex/</a> )                           |

**Table S2.** Comparison of performances of the STW-LightGBM model and other AOD-based models applied in previous studies at the national scale in China.

| Reference                | Model        | Period    | Spital<br>Resolution | Cross Validation |                                      | Regression<br>Equation |
|--------------------------|--------------|-----------|----------------------|------------------|--------------------------------------|------------------------|
|                          |              |           |                      | R <sup>2</sup>   | RMSE<br>( $\mu\text{g}/\text{m}^3$ ) |                        |
| Li, <i>et al.</i> [1]    | Geo-BPNN     | 2015      | 10 km                | 0.84             | 15.23                                | -                      |
|                          | Geo-GRNN     |           |                      | 0.82             | 16.93                                | -                      |
|                          | Geo-DBN      |           |                      | 0.88             | 13.03                                | -                      |
| He and Huang [2]         | GTWR         | 2015      | 3 km                 | 0.80             | 18.00                                | $Y=0.81X+11.69$        |
|                          | Two-stage    |           |                      | 0.72             | 21.01                                | $Y=0.73X+16.67$        |
|                          | D-GWR        |           |                      | 0.71             | 21.21                                | $Y=0.79X+12.92$        |
| You, <i>et al.</i> [3]   | GWR          | 2014      | 3 km                 | 0.79             | 18.60                                | $Y=0.83X+9.44$         |
| Li, <i>et al.</i> [4]    | GRNN         | 2013–2014 | 3 km                 | 0.816            | 20.93                                | $Y=0.616X+22.90$       |
| Xue, <i>et al.</i> [5]   | ML           | 2013–2016 | 3 km                 | 0.53             | 30.40                                | $Y=0.53X+25.3$         |
|                          | ML + GAM     |           |                      | 0.61             | 27.80                                | $Y=0.61X+21.2$         |
| Chen, <i>et al.</i> [6]  | RF           | 2014–2016 | 10 km                | 0.83             | 18.08                                | $Y=1.07X-4.64$         |
| Chen, <i>et al.</i> [7]  | XGBoost      | 2014–2015 | 3 km                 | 0.86             | 14.98                                | -                      |
| Zhang, <i>et al.</i> [8] | GBDT         | 2017      | 3 km                 | 0.81             | 11.57                                | $Y=0.78X+9.97$         |
| Wei, <i>et al.</i> [9]   | RF           | 2016      | 1 km                 | 0.81             | 17.91                                | $Y=0.77X+12.56$        |
|                          | STRF         |           |                      | 0.85             | 15.57                                | $Y=0.82X+9.64$         |
| Wei, <i>et al.</i> [10]  | STET         | 2013–2018 | 1 km                 | 0.887            | 14.6                                 | $Y=0.86X+7.11$         |
| He, <i>et al.</i> [11]   | ASTR         | 2013–2018 | 1 km                 | 0.59             | 27.18                                | $Y=0.61X+20.97$        |
| This study               | STW-LightGBM | 2015–2020 | 1 km                 | 0.92             | 10.00                                | $Y=0.9X+0.47$          |

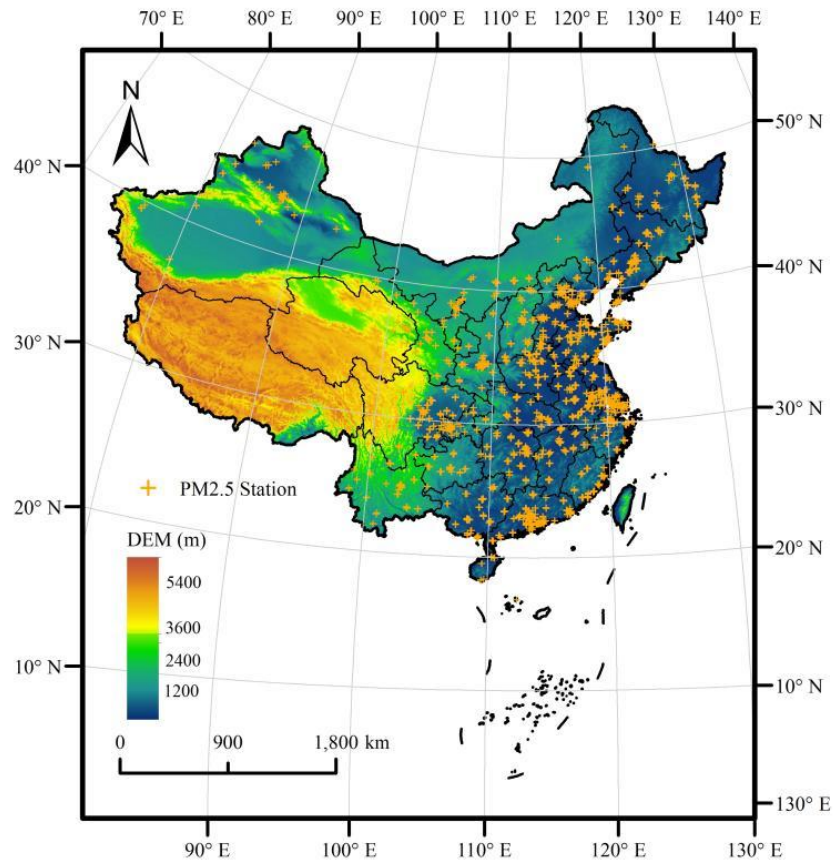

**Figure S1.** Spatial distribution of PM2.5 monitoring stations included in this study. The background is digital elevation, and the yellow cross is PM2.5 station.

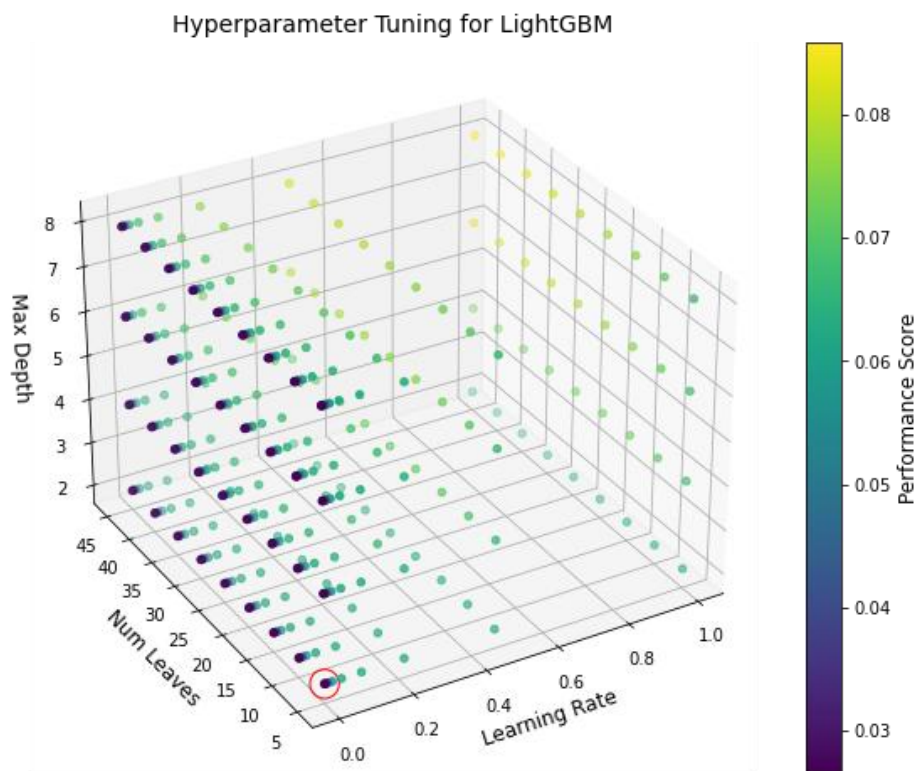

**Figure S2.** The visualization result of STW-LightGBM parameter adjustment.

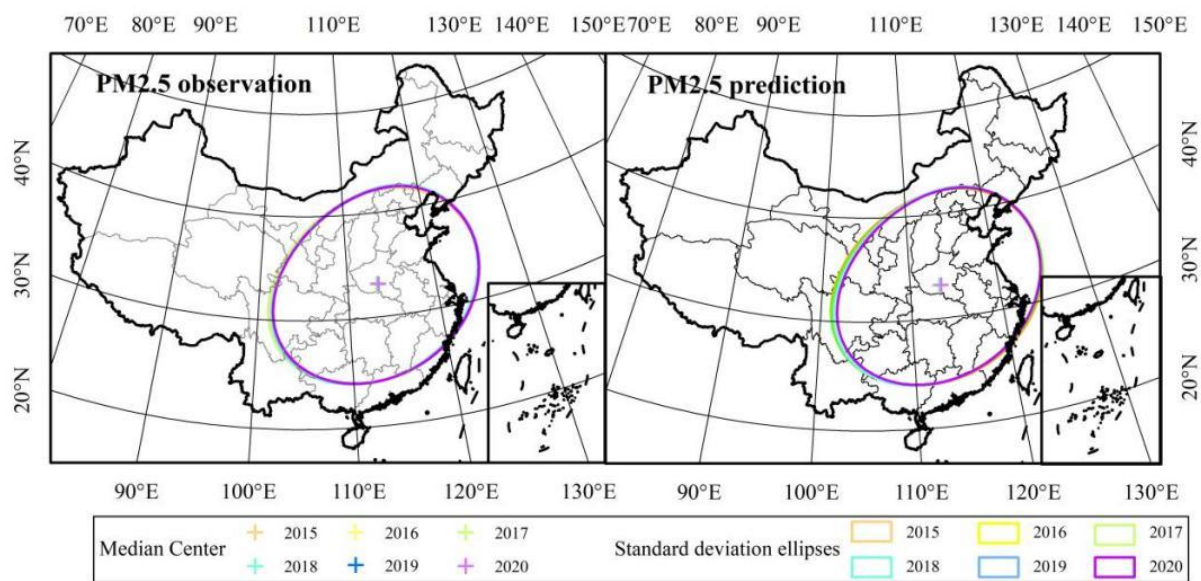

**Figure S3.** China's PM2.5 observed and predicted standard error ellipse from 2015 to 2020.

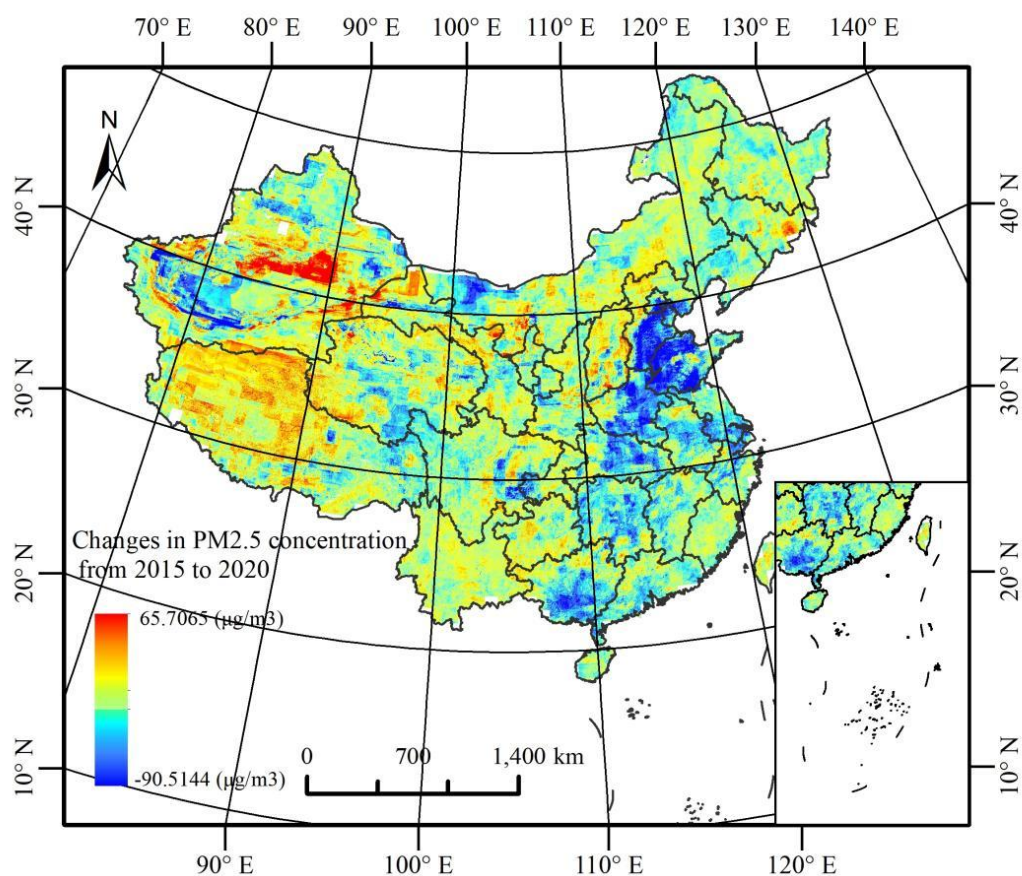

**Figure S4.** Changes in PM2.5 concentration in China from 2015 to 2020.

## References

1. Li, T.; Shen, H.; Yuan, Q.; Zhang, X.; Zhang, L. Estimating Ground-Level PM<sub>2.5</sub> by Fusing Satellite and Station Observations: A Geo-Intelligent Deep Learning Approach. *Geophys. Res. Lett.* **2017**, *44*, 11,985-911,993, doi:<https://doi.org/10.1002/2017GL075710>.
2. He, Q.; Huang, B. Satellite-based mapping of daily high-resolution ground PM<sub>2.5</sub> in China via space-time regression modeling. *Remote Sens. Environ.* **2018**, *206*, 72-83, doi:10.1016/j.rse.2017.12.018.
3. You, W.; Zang, Z.; Zhang, L.; Li, Y.; Pan, X.; Wang, W. National-Scale Estimates of Ground-Level PM<sub>2.5</sub> Concentration in China Using Geographically Weighted Regression Based on 3 km Resolution MODIS AOD. *Remote Sens.* **2016**, *8*, doi:10.3390/rs8030184.
4. Li, T.; Shen, H.; Zeng, C.; Yuan, Q.; Zhang, L. Point-surface fusion of station measurements and satellite observations for mapping PM<sub>2.5</sub> distribution in China: Methods and assessment. *Atmos. Environ.* **2017**, *152*, 477-489, doi:<https://doi.org/10.1016/j.atmosenv.2017.01.004>.
5. Xue, T.; Zheng, Y.; Tong, D.; Zheng, B.; Li, X.; Zhu, T.; Zhang, Q. Spatiotemporal continuous estimates of PM<sub>2.5</sub> concentrations in China, 2000–2016: A machine learning method with inputs from satellites, chemical transport model, and ground observations. *Environ. Int.* **2019**, *123*, 345-357, doi:<https://doi.org/10.1016/j.envint.2018.11.075>.
6. Chen, G.; Li, S.; Knibbs, L.D.; Hamm, N.A.S.; Cao, W.; Li, T.; Guo, J.; Ren, H.; Abramson, M.J.; Guo, Y. A machine learning method to estimate PM<sub>2.5</sub> concentrations across China with remote sensing, meteorological and land use information. *Sci. Total Environ.* **2018**, *636*, 52-60, doi:10.1016/j.scitotenv.2018.04.251.
7. Chen, Z.; Zhang, T.; Zhang, R.; Zhu, Z.-M.; Yang, J.; Chen, P.-Y.; Ou, C.-Q.; Guo, Y. Extreme gradient boosting model to estimate PM<sub>2.5</sub> concentrations with missing-filled satellite data in China. *Atmos. Environ.* **2019**, *202*, 180-189, doi:<https://doi.org/10.1016/j.atmosenv.2019.01.027>.
8. Zhang, T.; He, W.; Zheng, H.; Cui, Y.; Song, H.; Fu, S. Satellite-based ground PM<sub>2.5</sub> estimation using a gradient boosting decision tree. *Chemosphere* **2021**, *268*, 128801,

doi:<https://doi.org/10.1016/j.chemosphere.2020.128801>.

9. Wei, J.; Huang, W.; Li, Z.; Xue, W.; Peng, Y.; Sun, L.; Cribb, M. Estimating 1-km-resolution PM<sub>2.5</sub> concentrations across China using the space-time random forest approach. *Remote Sens. Environ.* **2019**, 231, doi:[10.1016/j.rse.2019.111221](https://doi.org/10.1016/j.rse.2019.111221).
10. Wei, J.; Li, Z.; Lyapustin, A.; Sun, L.; Peng, Y.; Xue, W.; Su, T.; Cribb, M. Reconstructing 1-km-resolution high-quality PM<sub>2.5</sub> data records from 2000 to 2018 in China: spatiotemporal variations and policy implications. *Remote Sens. Environ.* **2021**, 252, doi:[10.1016/j.rse.2020.112136](https://doi.org/10.1016/j.rse.2020.112136).
11. He, Q.; Gao, K.; Zhang, L.; Song, Y.; Zhang, M. Satellite-derived 1-km estimates and long-term trends of PM<sub>2.5</sub> concentrations in China from 2000 to 2018. *Environ. Int.* **2021**, 156, 106726, doi:<https://doi.org/10.1016/j.envint.2021.106726>.
